# Supplementary material for: Microwave assisted synthesis of high-surface area WO3 particles decorated with mosaic patterns via hydrochloric acid treatment of Bi2W2O9
Source: Royal Society of Chemistry journal article supplement (doi:10.1039/c5ra15167h), 2015-01-01
Supplement: c5ra15167h1.pdf [file c5ra15167h1.pdf]

## Supplementary Information

# Microwave Assisted Synthesis of High-surface Area WO<sub>3</sub> Particles Decorated with Mosaic Patterns via Hydrochloric Acid Treatment of Bi<sub>2</sub>W<sub>2</sub>O<sub>9</sub>

**Fuminao Kishimoto,<sup>a,b</sup> Dai Mochizuki,<sup>a,c</sup> Masato M Maitani,<sup>a</sup> Eiichi Suzuki<sup>a</sup> and Yuji Wada<sup>\*a</sup>,**

<sup>a</sup>. Department of Applied Chemistry, Tokyo Institute of Technology, 2-12 Ookayama, Meguro, Tokyo 152-8552, Japan. Fax: +81-3-5734-2879; Tel: +81-3-5734-2879; E-mail: yuji-w@apc.titech.ac.jp

<sup>b</sup>. Research Fellow of Japan Society for the Promotion of Science.

<sup>c</sup>. Present address: Interdisciplinary Cluster for Cutting Edge Research, Center for Energy and Environmental Science, Shinshu University, 3-15-1 Tokida, Ueda, Nagano 386-8567, Japan.

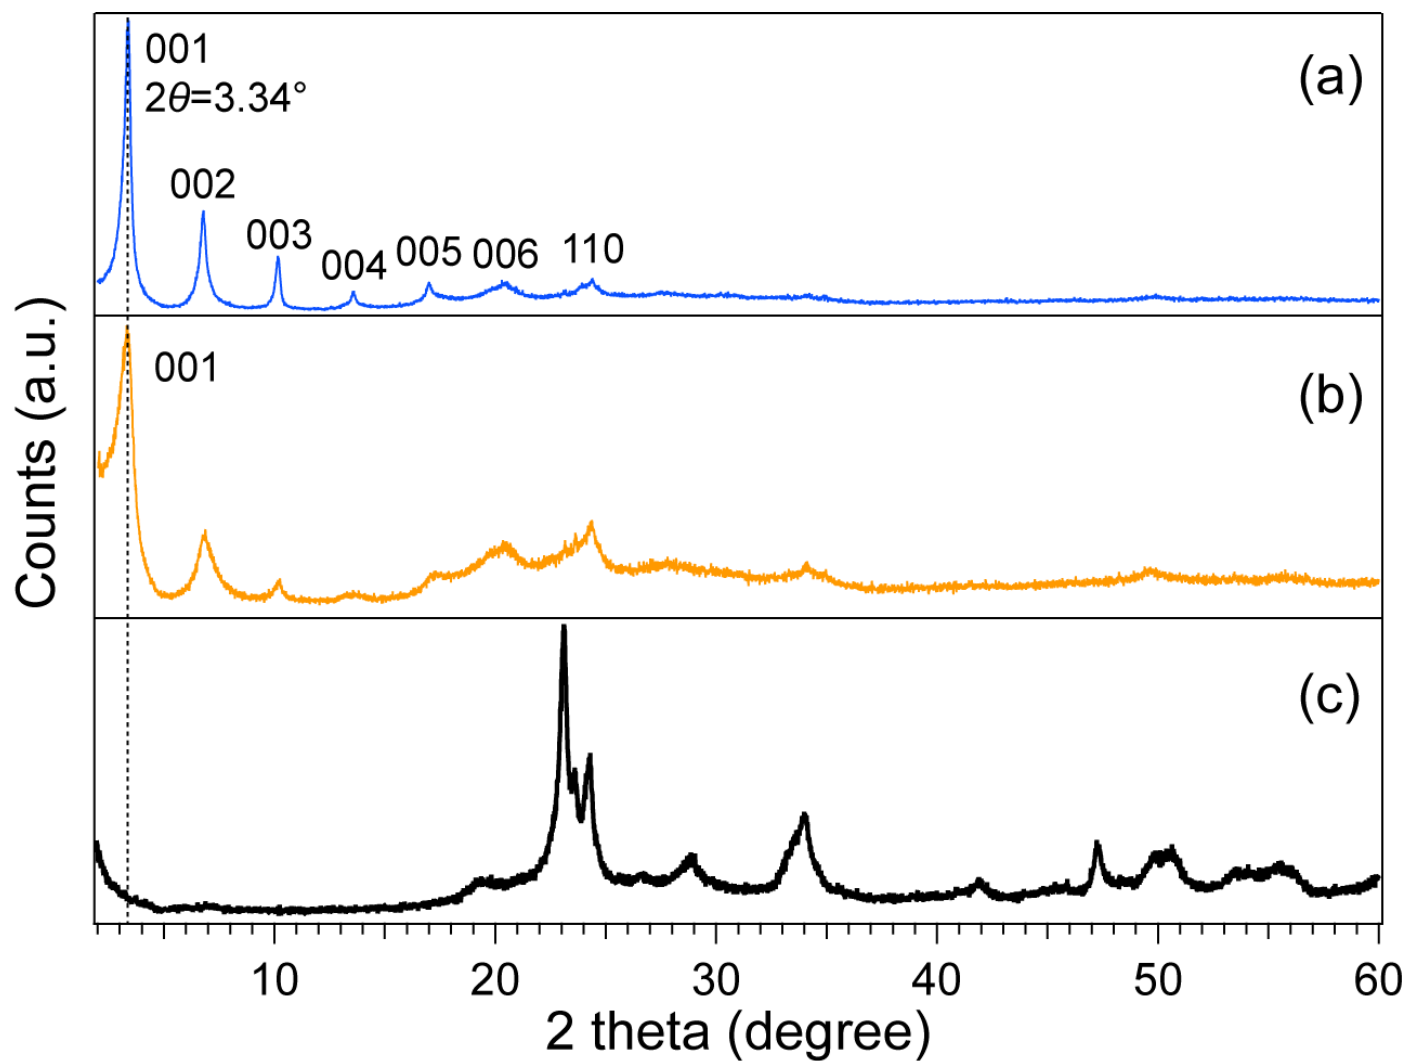

Figure S1. Powder XRD patterns of (a)  $\text{Bi}_2\text{W}_2\text{O}_9$  treated with HCl under conventional heating at  $80^\circ\text{C}$  for 1 h, subsequently treated with *n*-octylamine, (b)  $\text{Bi}_2\text{W}_2\text{O}_9$  treated with HCl under microwave heating at  $80^\circ\text{C}$  for 1 h, subsequently treated with *n*-octylamine, (c)  $\text{Bi}_2\text{W}_2\text{O}_9$  treated with HCl under conventional heating at  $200^\circ\text{C}$  for 1 h, subsequently treated with *n*-octylamine,

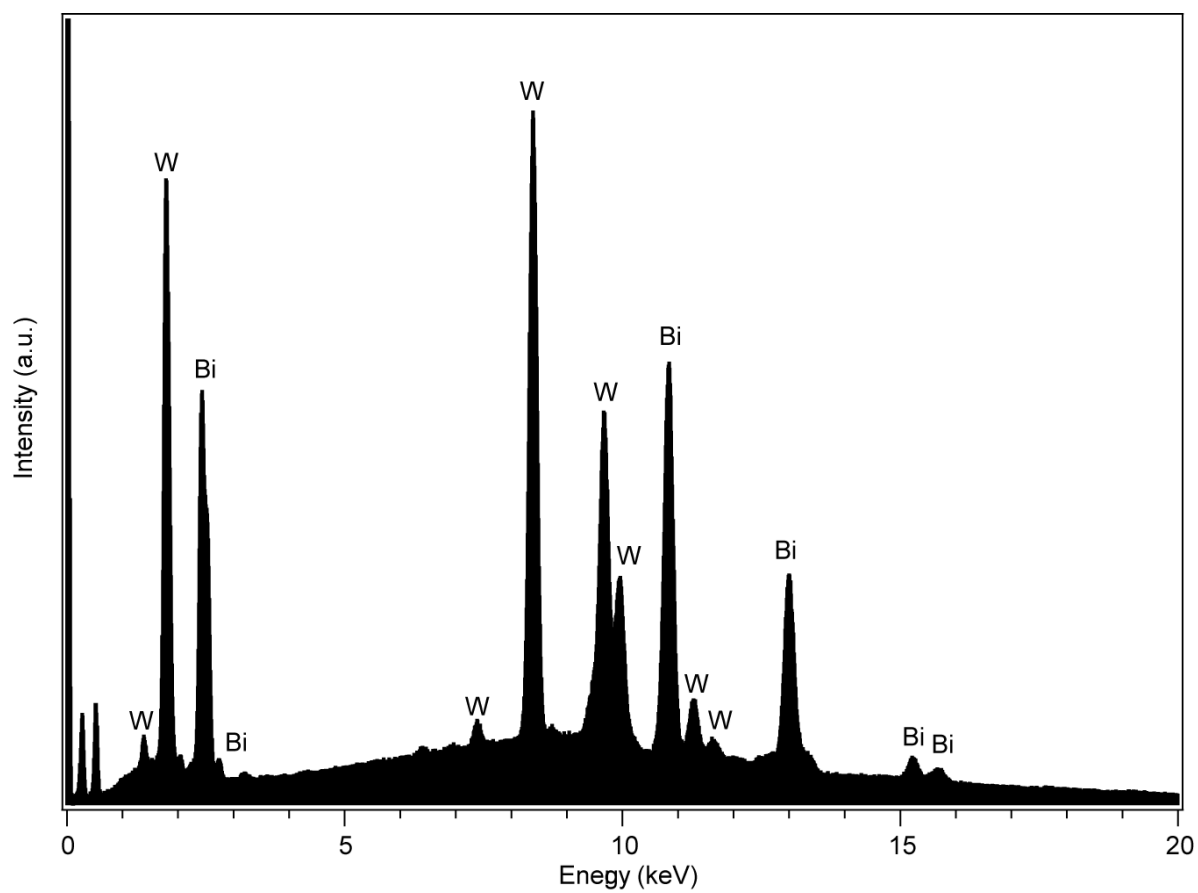

Figure S2. Energy dispersive X-ray spectrum of  $\text{Bi}_2\text{W}_2\text{O}_9$ .

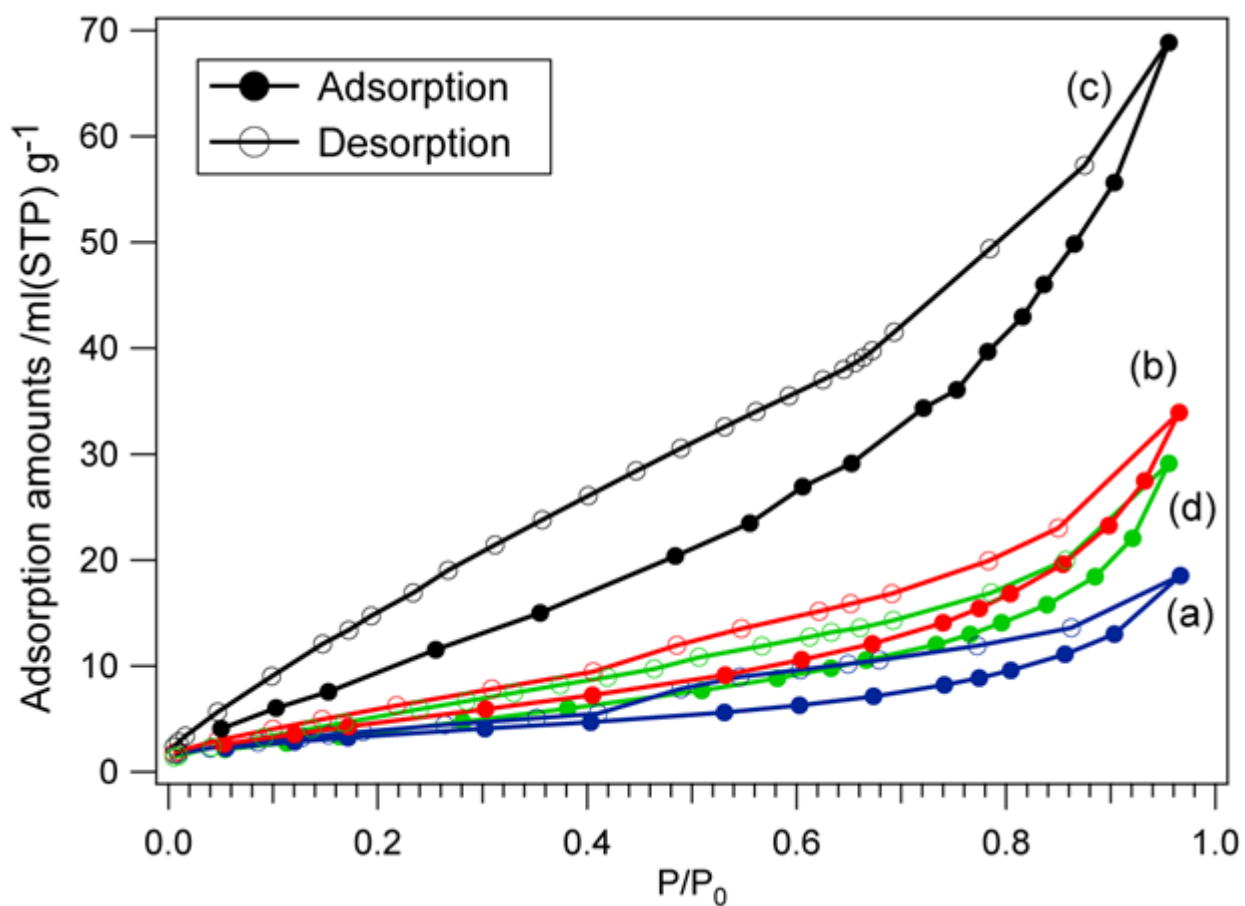

Figure S3. N<sub>2</sub> adsorption isotherm of WO<sub>3</sub> particles obtained by the hydrochloric acid treatment at 200 °C for (a) 5 min, (b) 30 min, (c) 60 min, (d) 120 min microwave heating.

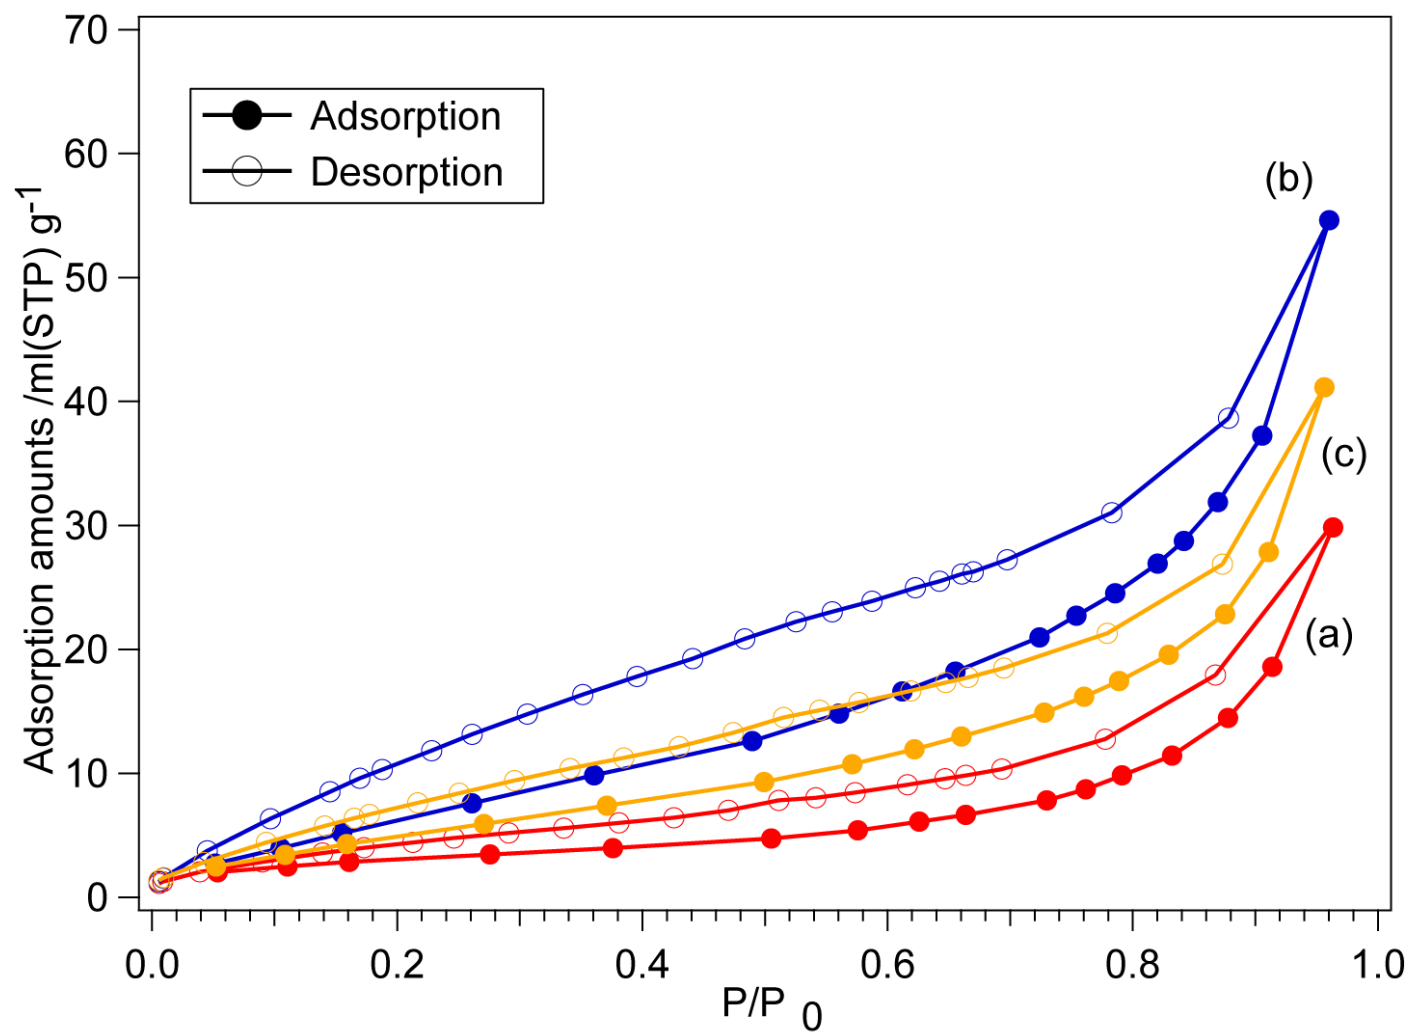

Figure S4. N<sub>2</sub> adsorption isotherm of WO<sub>3</sub> particles obtained by the hydrochloric acid treatment at 200 °C for (a) 2 h, (b) 4 h, (c) 6 h, (d) 12 h conventional heating.
